# Supplementary material for: Cholecystectomy and risk of cardiovascular disease, all-cause and cause-specific mortality: a systematic review and updated meta-analysis
Source: PeerJ journal article supplement (doi:10.7717/peerj.18174), 2024-09-30
Supplement: data.xlsx [file data.xlsx]

## Sheet: CS and CVD
	Study	Studytype	Disease	Origin	OR	95%CI LL	95%CI UL	reason for cs
⑦	Bortnichak et al 1985（1）	Cohort study	Coronary heart disease	America	1.75	1.13	2.69	Gallstone
⑦	Bortnichak et al 1985（2）	Cohort study	Coronary heart disease	America	0.7	0.4	1.24	Gallstone
②	Strom et al 1986	Case-control study	Myocardial infarction	America	0.8	0.5	1.1	Unknown reasons
⑤	Wirth et al 2015	Cohort study	Myocardial infarction	Europe	1.32	1.05	1.65	Gallstone
⑥	Shabanzadeh et al 2017 (CVD)	Cohort study	Cardiovascular disease	Europe	1.66	1.31	2.1	Gallstone
S1	Wei et al 2019	Cohort study	Stroke	Asia	0.6	0.59	0.62	Gallstone
①	Chen et al 2021	Cohort study	Myocardial infarction	Asia	0.65	0.61	0.69	Gallstone
④	Kim et al 2021	Cohort study	Heart disease	Asia	1.399	1.361	1.438	Unknown reasons
③	Park et al 2022（1）	Cohort study	Myocardial infarction	Asia	1.1	1.03	1.16	Gallstone
③	Park et al 2022（2）	Cohort study	Cerebral infarction	Asia	1.02	0.98	1.06	Gallstone

## Sheet: CS and CVD-stable
	Study	Studytype	Disease	Origin	OR	95%CI LL	95%CI UL
⑦	Bortnichak et al 1985（1）	Cohort study	Coronary heart disease	America	1.75	1.13	2.69
⑦	Bortnichak et al 1985（2）	Cohort study	Coronary heart disease	America	0.7	0.4	1.24
②	Strom et al 1986	Case-control study	Myocardial infarction	America	0.8	0.5	1.1
⑤	Wirth et al 2015	Cohort study	Myocardial infarction	Europe	1.32	1.05	1.65
⑥	Shabanzadeh et al 2017	Cohort study	Cardiovascular disease	Europe	1.66	1.31	2.1
③	Park et al 2022（1）	Cohort study	Myocardial infarction	Asia	1.1	1.03	1.16

## Sheet: CHD
	Study	Studytype	Disease	Origin	OR	95%CI LL	95%CI UL
⑦	Bortnichak et al 1985（1）	Cohort study	Coronary heart disease	America	1.75	1.13	2.69
⑦	Bortnichak et al 1985（2）	Cohort study	Coronary heart disease	America	0.7	0.4	1.24
②	Strom et al 1986	Case-control study	Coronary heart disease	America	0.8	0.5	1.1
⑤	Wirth et al 2015	Cohort study	Coronary heart disease	Europe	1.32	1.05	1.65
⑥	Shabanzadeh et al 2017	Cohort study	Coronary heart disease	Europe	1.61	1.18	2.19
③	Park et al 2022（1）	Cohort study	Coronary heart disease	Asia	1.1	1.03	1.16

## Sheet: subgroup
	Study	Studytype	Disease	Origin	OR	95%CI LL	95%CI UL
⑦	Bortnichak et al 1985（1）	Cohort study	Coronary heart disease	America	1.75	1.13	2.69
⑦	Bortnichak et al 1985（2）	Cohort study	Coronary heart disease	America	0.7	0.4	1.24
②	Strom et al 1986	Case-control study	Coronary heart disease	America	0.8	0.5	1.1
⑤	Wirth et al 2015	Cohort study	Coronary heart disease	Europe	1.32	1.05	1.65
⑥	Shabanzadeh et al 2017	Cohort study	Coronary heart disease	Europe	1.61	1.18	2.19
①	Chen et al 2020	Cohort study	Coronary heart disease	Asia	0.65	0.61	0.69
④	Kim et al 2021	Cohort study	Coronary heart disease	Asia	1.059	0.981	1.114
③	Park et al 2022（1）	Cohort study	Coronary heart disease	Asia	1.1	1.03	1.16
S1	Wei et al 2019	Cohort study	Stroke	Asia	0.6	0.59	0.62
③	Park et al 2022（2）	Cohort study	Stroke	Asia	1.02	0.98	1.06

## Sheet: sensitivity
	Study	Studytype	Disease	Origin	OR	95%CI LL	95%CI UL
⑦	Bortnichak et al 1985（1）	Cohort study	Coronary heart disease	America	1.75	1.13	2.69
⑦	Bortnichak et al 1985（2）	Cohort study	Coronary heart disease	America	0.7	0.4	1.24
②	Strom et al 1986	Case-control study	Myocardial infarction	America	0.8	0.5	1.1
⑤	Wirth et al 2015	Cohort study	Myocardial infarction	Europe	1.32	1.05	1.65
⑥	Shabanzadeh et al 2017	Cohort study	Cardiovascular disease	Europe	1.66	1.31	2.1
S1	Wei et al 2019	Cohort study	Stroke	Asia	0.6	0.59	0.62
①	Chen et al 2020	Cohort study	Myocardial infarction	Asia	0.65	0.61	0.69
④	Kim et al 2021	Cohort study	Heart disease	Asia	1.399	1.361	1.438
③	Park et al 2022（1）	Cohort study	Myocardial infarction	Asia	1.1	1.03	1.16
③	Park et al 2022（2）	Cohort study	Cerebral infarction	Asia	1.02	0.98	1.06

## Sheet: cardiac mortality
	Study	Studytype	Disease	Origin	OR	95%CI LL	95%CI UL
M2	Ruhl et al 2011	Cohort study	cardiac mortality	America	1.3	1.1	1.6
M4	Shabanzadeh et al 2017	Cohort study	cardiac mortality	Europe	1.47	1.06	2.04
M5	Su et al 2022	Cohort study	cardiac mortality	Asia	0.88	0.57	1.34
M3	Konyn et al 2023	Cohort study	cardiac mortality	America	1.19	0.86	1.66

## Sheet: Sheet1
	Study	Studytype	Disease	Origin	OR	95%CI LL	95%CI UL
M2	Ruhl et al 2011	Cohort study	cardiac mortality	America	1.3	1.1	1.6
M4	Shabanzadeh et al 2017	Cohort study	cardiac mortality	Europe	1.47	1.06	2.04
M5	Su et al 2022	Cohort study	cardiac mortality	Asia	0.88	0.57	1.34
M3	Konyn et al 2023	Cohort study	cardiac mortality	America	1.19	0.86	1.66

## Sheet: all cause mortality
	Study	Studytype	Disease	Origin	OR	95%CI LL	95%CI UL
M7	Andersen et al 1995	Cohort study	all-cause mortality	Europe	1.3	1.1	1.6
⑨	Rosenmüller et al 2007	Cohort study	all-cause mortality	Europe	1.13	0.44	2.93
M2	Ruhl et al 2011	Cohort study	all-cause mortality	America	1.3	1.1	1.5
M4	Shabanzadeh et al 2017 (mortality)	Cohort study	all-cause mortality	Europe	1.22	1.02	1.46
M5	Su et al 2022	Cohort study	all-cause mortality	Asia	0.73	0.52	1.02
M3	Konyn et al 2023	Cohort study	all-cause mortality	America	1.15	0.95	1.39

## Sheet: cancer
	Study	Studytype	Disease	Origin	OR	95%CI LL	95%CI UL
M2	Ruhl et al 2011	Cohort study	cancer mortality	America	1.2	0.79	1.7
M3	Konyn et al 2023	Cohort study	cancer mortality	America	1.07	0.67	1.72
M4	Shabanzadeh et al 2016	Cohort study	cancer mortality	Europe	1.23	0.89	1.7

## Sheet: cohort-7-合并
	Study	Studytype	Disease	Origin	OR	95%CI LL	95%CI UL
⑦	BORTNICHAK et al 1984	Cohort study	Coronary heart disease	America	1.75	1.13	2.69
⑦	BORTNICHAK et al 1984	Cohort study	Coronary heart disease	America	0.7	0.4	1.24

[truncated: 2 more sheets: 9-合并, cohort-CS and MI]
