# Supplementary material for: Cholecystectomy and risk of cardiovascular disease, all-cause and cause-specific mortality: a systematic review and updated meta-analysis
Source: PeerJ journal article supplement (doi:10.7717/peerj.18174), 2024-09-30
Supplement: TableS1.docx [file TableS1.docx]

**Supplementary Table 1 Data extraction and quality assessment of studies by Newcastle-Ottawa Scale (NOS)**

| **Study** | **RR** | **95%CI**  **Lower Limit** | **95%CI**  **Upper Limit** | **Selection** | **Comparability** | **Outcome** | **Total NOS** |
| --- | --- | --- | --- | --- | --- | --- | --- |
| Bortnichak et al 1985 (1) | 1.75 | 1.13 | 2.69 | ★★★ | ★★ | ★★ | 7 |
| Bortnichak et al 1985 (2) | 0.7 | 0.4 | 1.24 |  |  |  |  |
| Strom et al 1986 | 0.8 | 0.5 | 1.1 | ★★★ | ★ | ★★ | 6 |
| Andersen et al 1995 | 1.3 | 1.1 | 1.6 | ★★★★ | ★ | ★★ | 7 |
| Rosenmüller et al 2007 | 1.13 | 0.44 | 2.93 | ★★ | — | ★★ | 4 |
| Ruhl et al 2011 | 1.3 | 1.1 | 1.5 | ★★★ | ★★ | ★★ | 7 |
| Wirth et al 2015 | 1.32 | 1.05 | 1.65 | ★★ | ★★ | ★★ | 6 |
| Shabanzadeh et al 2016 | 1.22 | 1.02 | 1.46 | ★★★ | ★★ | ★★ | 7 |
| Shabanzadeh et al 2017 | 1.66 | 1.31 | 2.1 | ★★★ | ★★ | ★★★ | 8 |
| Wei et al 2019 | 0.6 | 0.59 | 0.62 | ★★★★ | ★★ | ★★ | 8 |
| Chen et al 2021 | 0.65 | 0.61 | 0.69 | ★★★ | ★★ | ★★ | 7 |
| Kim et al 2021 | 1.399 | 1.361 | 1.438 | ★★★ | ★★ | ★★ | 7 |
| Park et al 2022 (1) | 1.1 | 1.03 | 1.16 | ★★★ | — | ★★ | 5 |
| Park et al 2022 (2) | 1.02 | 0.98 | 1.06 |  |  |  |  |
| Su et al 2022 | 0.73 | 0.52 | 1.02 | ★★★ | ★★ | ★★ | 7 |
| Konyn et al 2023 | 1.15 | 0.95 | 1.39 | ★★★ | ★★ | ★★ | 7 |

★ represents one point in Newcastle-Ottawa Scale scoring system.

RR, relative risk; CI, confidential interval;
